# Supplementary material
Source: PubMed Central journal article supplement (PMC3987943)

# Supplementary Figure 1

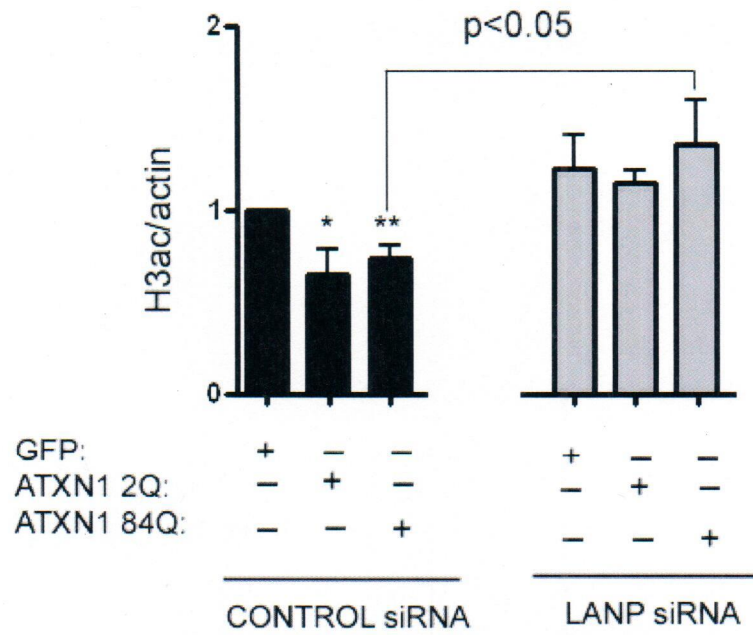

Supplement: NIHMS418471-supplement-Supplemental_Figure_1.pdf [file NIHMS418471-supplement-Supplemental_Figure_1.pdf]

# Supplementary Figure 2.

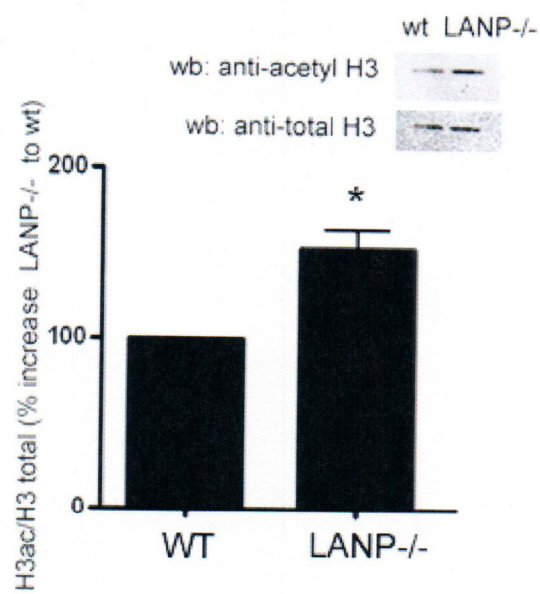

Supplement: NIHMS418471-supplement-Supplemental_Figure_2.pdf [file NIHMS418471-supplement-Supplemental_Figure_2.pdf]

# Supplementary Figure 3.

a      SCA1;LANP+/+                      SCA1;LANP-/-

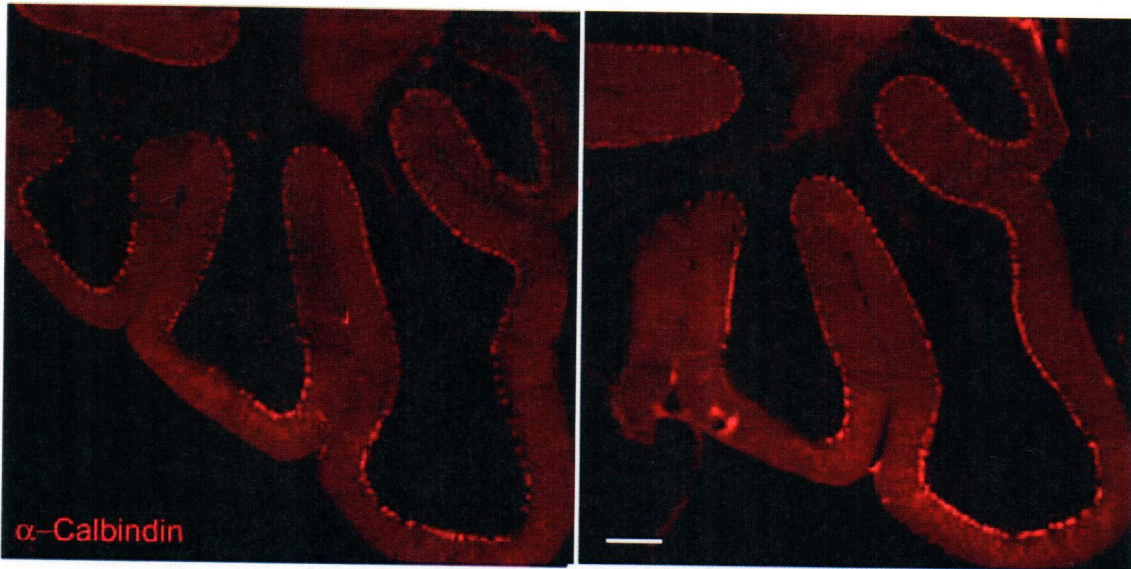

b

WT                      SCA1;LANP+/+                      SCA1;LANP-/-

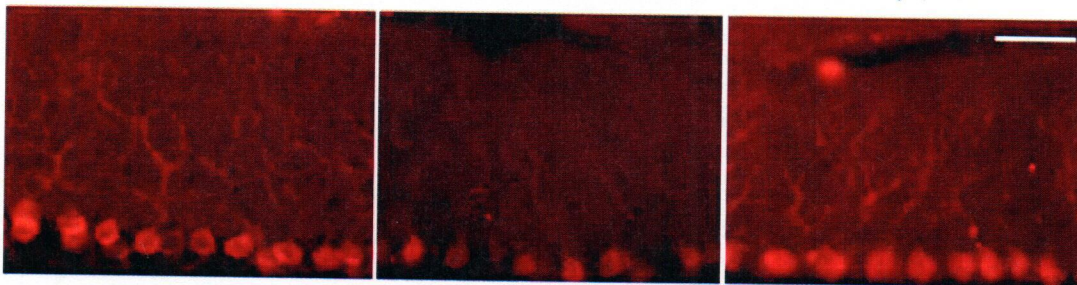

$\alpha$ -Calbindin

Supplement: NIHMS418471-supplement-Supplemental_Figure_3.pdf [file NIHMS418471-supplement-Supplemental_Figure_3.pdf]
